# Supplementary material for: Delineating the risk factors, sources of acquisition and clinical outcomes in neonates colonised with multidrug-resistant bacteria: The NeoCol study
Source: Research Square preprint supplement (doi:10.21203/rs.3.rs-8346248/v1), 2026-02-03
Supplement: Supplementary file 1 [file d068f02b77ea211e6998240c.docx]

**Supplementary Data**

**Supplementary Figure 1**

CONSORT diagram of study population (Enrolment to day 28 follow-up)


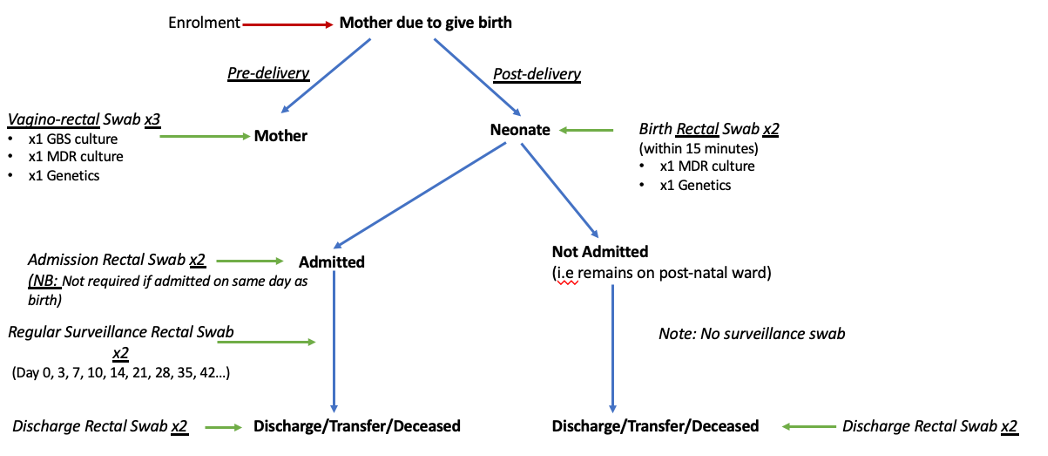


**Supplementary Figure 2:**

Sample collection timing of participants throughout the study period

***Supplementary Figure 3:*** *Time to colonisation for (a) any MDR-GN pathogen, (b) ESBL-producing pathogens, and (c) CREs; stratified by exposure to antibiotics*

***
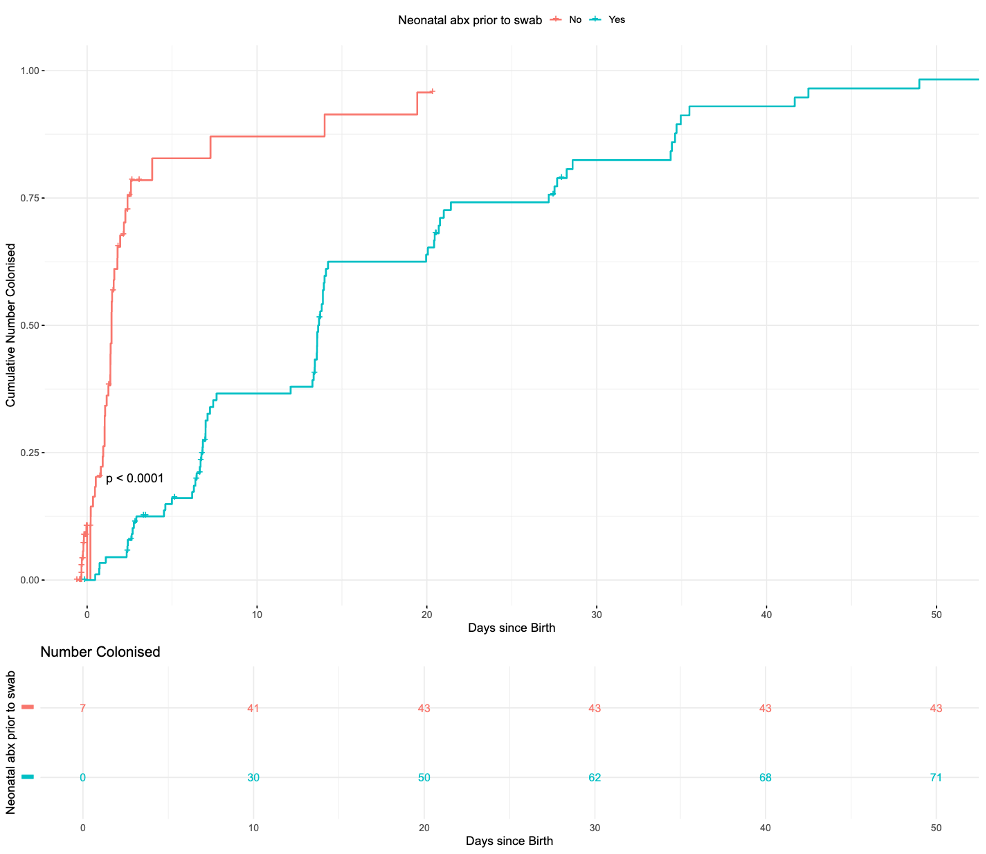
***

1. *Time-to-colonisation with any MDR-GN for colonised infants, stratified by exposure to antibiotics prior to colonisation swab*

***
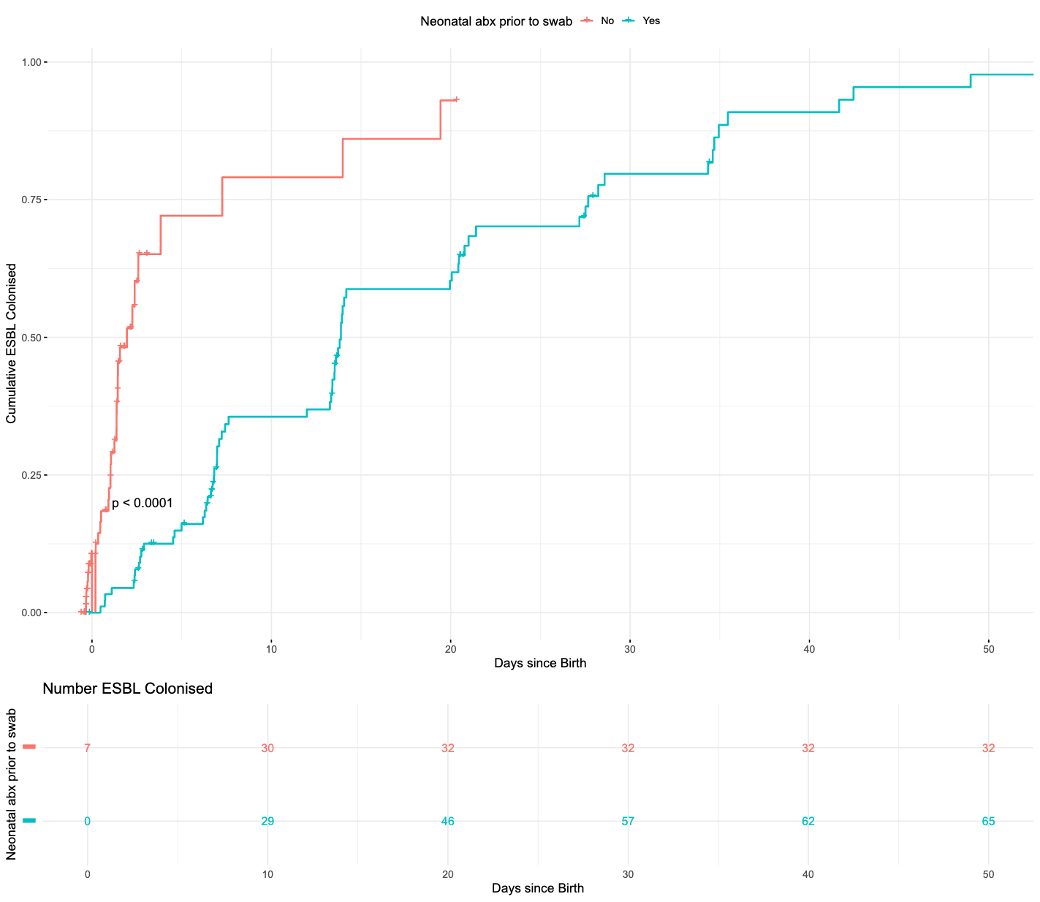
***

1. *Time-to-colonisation with any ESBL-producing organisms for ESBL-colonised infants, stratified by exposure to antibiotics prior to colonisation swab*

***
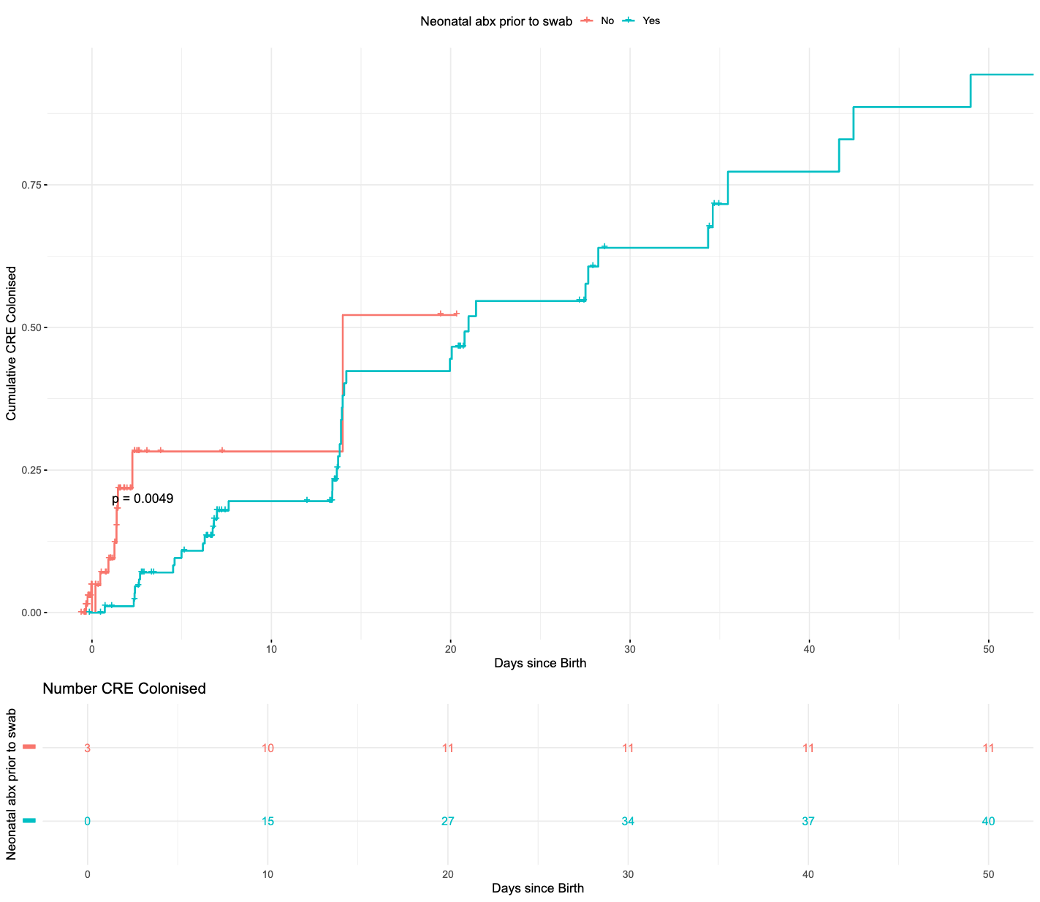
***

1. *Time-to-colonisation with any CRE organisms for CRE-colonised infants, stratified by exposure to antibiotics prior to colonisation swab*

**Supplementary Figure 4:** *Neonatal antibiotic class exposure prior to colonisation with MDR-GN organism.*

Note: * represents statistically significant difference between colonised and not colonised groups

**Supplementary Table 1:** *Colonising gram-negative organisms (neonates)*

| Organism | Count |
| --- | --- |
| Klebsiella pneumoniae | 112 |
| Escherichia coli | 37 |
| Acinetobacter baumannii | 29 |
| Enterobacter hormaechei | 14 |
| Pseudomonas aeruginosa | 3 |
| Serratia marcescens | 3 |
| Klebsiella aerogenes (Enterobacter aerogenes) | 2 |
| Pseudomonas monteilii | 2 |
| Stenotrophomonas maltophilia | 2 |
| Acinetobacter pittii (Acinotebacter Baumannii Complex) | 1 |
| Chryseobacterium arthrosphaerae | 1 |
| Chryseobacterium daecheongense | 1 |
| Leclercia adecarboxylata | 1 |
| Pseudescherichia vulneris | 1 |
| Pseudomona otitidis | 1 |
| Pseudomonas putida | 1 |
| Stenotrophomonas maltophilia | 1 |

**Supplementary Table 2:** *Colonising gram negative organisms (maternal)*

| Organism | Count |
| --- | --- |
| Escherichia coli | 58 |
| Acinetobacter baumannii | 19 |
| Klebsiella pneumoniae | 14 |
| Acinetobacter ursingii | 4 |
| Enterobacter hormaechei | 5 |
| Unidentified | 3 |
| Enterobacter cloacae | 2 |
| Acinetobacter nosocomialis | 1 |
| Burkholderia cepacia | 1 |
| Burkholderia vietnamiensis | 1 |
| Chryseobacterium arthrosphaerae | 1 |
| Chryseobacterium tructae | 1 |
| Citrobacter freundii | 1 |
| Kluyvera ascorbata | 1 |
| Pseudomonas putida | 1 |
| Pseudomonas citronellosis | 1 |
| Pseudomonas nitroreducens | 1 |
| Stenotrophomonas maltophilia | 1 |

**Supplementary Table 3:** Pathogens identified as causative of invasive neonatal infections:

| **Organism** | **Count** | **Infection onset ≤ 48 hours of life** |
| --- | --- | --- |
| *Klebsiella pneumoniae* | 4 | 1 |
| *Staphylococcus epidermidis* | 3 | 1 |
| *Staphylococcus aureus* | 1 | 0 |
| *Serratia marcescens* | 1 | 0 |
| *Klebsiella oxytoca* | 1 | 0 |
| *Acinetobacter baumannii* | 1 | 0 |

**Supplementary Table 4:** Frequency of Infant and Maternal co-Colonisation

| Mother_Colonised | Infant_Colonised | CRE | ESBL | CRGN |
| --- | --- | --- | --- | --- |
| Yes | Yes | 1 | 55 | 9 |
| No | Yes | 50 | 42 | 20 |
| Yes | No | 5 | 48 | 24 |
| No | No | 133 | 44 | 136 |

**Supplementary Table 5:** Maternal colonisation characteristics

| **Characteristic** | **Overall**  **N = 189** | **Not colonised**  **N = 69** | **Colonised**  **N = 120** | **p-value** |
| --- | --- | --- | --- | --- |
| **Maternal Age** | 31.1 (26.6, 35.6) | 31.0 (27.7, 35.7) | 31.5 (26.2, 35.4) | >0.9 |
| **Maternal Education** | NA | NA | NA | >0.9 |
| Nil or Primary | 16 (8.5%) | 5 (7.2%) | 11 (9.2%) | NA |
| Secondary | 97 (51%) | 36 (52%) | 61 (51%) | NA |
| Tertiary | 76 (40%) | 28 (41%) | 48 (40%) | NA |
| **Maternal Employment** | NA | NA | NA | 0.5 |
| Student or Employed | 58 (31%) | 24 (35%) | 34 (28%) | NA |
| Unemployed or Household Duties | 129 (68%) | 44 (64%) | 85 (71%) | NA |
| Unknown | 2 (1.1%) | 1 (1.4%) | 1 (0.8%) | NA |
| **Household income (Indonesian rupiah)** | 3,500,000 (0, 7,000,000) | 3,000,000 (0, 6,000,000) | 4,000,000 (0, 7,000,000) | >0.9 |
| **Household Population** | NA | NA | NA | 0.8 |
| <= 3 | 57 (33%) | 22 (34%) | 35 (32%) | NA |
| >= 7 | 7 (4.0%) | 3 (4.7%) | 4 (3.6%) | NA |
| 4 - 6 | 111 (63%) | 39 (61%) | 72 (65%) | NA |
| **Household Water Access** | NA | NA | NA | >0.9 |
| Limited or basic | 105 (56%) | 38 (55%) | 67 (56%) | NA |
| Safe | 73 (39%) | 27 (39%) | 46 (39%) | NA |
| Unknown | 10 (5.3%) | 4 (5.8%) | 6 (5.0%) | NA |
| **Household Toilet Access** | NA | NA | NA | 0.6 |
| Limited or basic | 107 (57%) | 36 (52%) | 71 (60%) | NA |
| Safe | 71 (38%) | 29 (42%) | 42 (35%) | NA |
| Unknown | 10 (5.3%) | 4 (5.8%) | 6 (5.0%) | NA |
| **Household Handwashing Access** | NA | NA | NA | 0.6 |
| Basic | 169 (90%) | 64 (93%) | 105 (88%) | NA |
| Limited or no facility | 10 (5.3%) | 2 (2.9%) | 8 (6.7%) | NA |
| Unknown | 9 (4.8%) | 3 (4.3%) | 6 (5.0%) | NA |
| **Number of Time Bathing per Week** | NA | NA | NA | 0.3 |
| 2-5 | 9 (4.8%) | 1 (1.4%) | 8 (6.7%) | NA |
| 6-7 | 166 (88%) | 63 (91%) | 103 (87%) | NA |
| Unknown | 13 (6.9%) | 5 (7.2%) | 8 (6.7%) | NA |
| **Accessed Antenatal Care** | 188 (99%) | 68 (99%) | 120 (100%) | 0.4 |
| **Gravida** | NA | NA | NA | 0.9 |
| >= 5 | 13 (6.9%) | 5 (7.2%) | 8 (6.7%) | NA |
| 2-4 | 109 (58%) | 41 (59%) | 68 (57%) | NA |
| Primagravida | 67 (35%) | 23 (33%) | 44 (37%) | NA |
| **Parity** | NA | NA | NA | 0.6 |
| >= 5 | 5 (2.6%) | 2 (2.9%) | 3 (2.5%) | NA |
| 2-4 | 172 (91%) | 61 (88%) | 111 (93%) | NA |
| Primaparity | 12 (6.3%) | 6 (8.7%) | 6 (5.0%) | NA |
| **Admitted During Pregnancy** | NA | NA | NA | 0.5 |
| No | 132 (70%) | 52 (75%) | 80 (67%) | NA |
| Unknown | 8 (4.2%) | 2 (2.9%) | 6 (5.0%) | NA |
| Yes | 49 (26%) | 15 (22%) | 34 (28%) | NA |
| **Antibiotics During Pregnancy** | NA | NA | NA | 0.047 |
| No | 155 (82%) | 60 (87%) | 95 (80%) | NA |
| Unknown | 9 (4.8%) | 0 (0%) | 9 (7.6%) | NA |
| Yes | 24 (13%) | 9 (13%) | 15 (13%) | NA |
| Cephalosporins | 10 (5.3%) | 4 (5.8%) | 6 (5.0%) | >0.9 |
| Unknown class | 11 (5.8%) | 4 (5.8%) | 7 (5.8%) | >0.9 |
| Metronidazole | 2 (1.1%) | 0 (0%) | 2 (1.7%) | 0.5 |
| Penicillins | 2 (1.1%) | 0 (0%) | 2 (1.7%) | 0.5 |
| Azithromycin | 3 (1.6%) | 3 (4.3%) | 0 (0%) | 0.047 |
| Ciprofloxacin | 1 (0.5%) | 0 (0%) | 1 (0.8%) | >0.9 |

**Supplementary Table 6:** LASSO regression, outcome of neonatal colonisation

| Term | Odds Ratio (95% CI) | Standard Error | Statistic | p Value |
| --- | --- | --- | --- | --- |
| (Intercept) | 0.612 (0.391–0.945) | 0.224 | -2.192 | 0.028 |
| NICU admission | 1.063 (1.023–1.114) | 0.022 | 2.804 | 0.005 |
| Maternal antibiotics in pregnancy (Unknown) | 0.426 (0.083–1.962) | 0.789 | -1.083 | 0.279 |
| Maternal antibiotics in pregnancy (Yes) | 2.072 (0.721–6.876) | 0.565 | 1.291 | 0.197 |
| Neonatal antibiotic exposure | 1.684 (0.647–4.366) | 0.483 | 1.078 | 0.281 |

**Supplementary Table 7:** LASSO regression, outcome of neonatal infection episode

| Term | Odds Ratio (95% CI) | Standard Error | Statistic | p Value |
| --- | --- | --- | --- | --- |
| (Intercept) | 0.009 (0–0.055) | 1.199 | -3.944 | 0 |
| Colonised | 1.363 (0.059–15.854) | 1.284 | 0.241 | 0.809 |
| Neonatal antibiotic exposure | 3827.43 (492.945–104113.797) | 1.274 | 6.476 | 0 |

**Supplementary Table 8:** LASSO regression, outcome of neonatal mortality

| Term | Odds Ratio (95% CI) | Standard Error | Statistic | p Value |
| --- | --- | --- | --- | --- |
| (Intercept) | 0.068 (0.001–5.572) | 2.283 | -1.177 | 0.239 |
| Colonised | 2.537 (0.537–12.96) | 0.798 | 1.166 | 0.244 |
| NICU admission | 0.27 (0.01–7.455) | 1.482 | -0.884 | 0.377 |
| Birthweight | 1.002 (1.001–1.004) | 0.001 | 2.955 | 0.003 |
| Admission duration | 1.134 (1.039–1.28) | 0.052 | 2.394 | 0.017 |
| Maternal antibiotics in pregnancy (Unknown) | 0.559 (0.045–14.283) | 1.363 | -0.427 | 0.669 |
| Maternal antibiotics in pregnancy (Yes) | 3.3 (0.38–80.004) | 1.272 | 0.938 | 0.348 |
| Neonatal antibiotic exposure | 0.118 (0.005–1.237) | 1.346 | -1.589 | 0.112 |

**Supplementary Table 9:** LASSO regression, outcome of neonatal mortality amongst ESBL colonised infants

| Term | Odds Ratio (95% CI) | Standard Error | Statistic | p Value |
| --- | --- | --- | --- | --- |
| (Intercept) | 0.048 (0–2.291) | 2.127 | -1.423 | 0.155 |
| Colonised | 2.087 (0.495–9.276) | 0.736 | 0.999 | 0.318 |
| Birthweight | 1.002 (1.001–1.004) | 0.001 | 3.043 | 0.002 |
| Admission duration | 1.126 (1.04–1.256) | 0.048 | 2.475 | 0.013 |
| Neonatal antibiotic exposure | 0.067 (0.006–0.569) | 1.159 | -2.332 | 0.02 |

**Supplementary Table 10:** LASSO regression, outcome of neonatal mortality amongst CRE colonised infants

| Term | Odds Ratio (95% CI) | Standard Error | Statistic | p Value |
| --- | --- | --- | --- | --- |
| (Intercept) | 0.037 (0–1.811) | 2.163 | -1.53 | 0.126 |
| Colonised | 1.663 (0.345–10.045) | 0.841 | 0.605 | 0.545 |
| Birthweight | 1.003 (1.001–1.004) | 0.001 | 3.17 | 0.002 |
| Admission duration | 1.139 (1.045–1.283) | 0.052 | 2.512 | 0.012 |
| Maternal antibiotics in pregnancy (Unknown) | 0.613 (0.052–16.012) | 1.366 | -0.358 | 0.721 |
| Maternal antibiotics in pregnancy (Yes) | 3.524 (0.407–86.929) | 1.277 | 0.986 | 0.324 |
| Neonatal antibiotic exposure | 0.069 (0.006–0.563) | 1.128 | -2.368 | 0.018 |

**Supplementary Table 11:** LASSO regression, outcome of neonatal mortality amongst CRGN colonised infants

| Term | Odds Ratio (95% CI) | Standard Error | Statistic | p Value |
| --- | --- | --- | --- | --- |
| (Intercept) | 0.05 (0–4.01) | 2.264 | -1.319 | 0.187 |
| Colonised | 35202720.337 (0–NA) | 1858.094 | 0.009 | 0.993 |
| NICU admission | 0.231 (0.008–6.39) | 1.486 | -0.988 | 0.323 |
| Birthweight | 1.003 (1.001–1.004) | 0.001 | 3.153 | 0.002 |
| Admission duration | 1.151 (1.051–1.312) | 0.056 | 2.52 | 0.012 |
| Maternal antibiotics in pregnancy (Unknown) | 0.588 (0.044–15.877) | 1.403 | -0.378 | 0.705 |
| Maternal antibiotics in pregnancy (Yes) | 5.236 (0.574–136.534) | 1.313 | 1.261 | 0.207 |
| Neonatal antibiotic exposure | 0.156 (0.006–1.48) | 1.292 | -1.435 | 0.151 |

**Supplementary Table 12:** Unadjusted Cox Proportional Hazards Model, time to colonisation with any resistant gram-negative organism in those with an episode of infection vs no episode of infection

| **Variable** | **Hazard ratio** | **Confidence interval** | **p-value** |
| --- | --- | --- | --- |
| Infection episode | 0.21 | 0.14 to 0.32 | <0.001 |

**Supplementary Table 13:** Adjusted Cox Proportional Hazards Model, time to colonisation with any resistant gram-negative organism in those with an episode of infection vs no episode of infection

| **Variable** | **Hazard ratio** | **Confidence interval** | **p-value** |
| --- | --- | --- | --- |
| Infection episode | 0.81 | 0.43 to 1.53 | 0.52 |
| NICU Admission | 0.15 | 0.06 to 0.37 | <0.001 |
| Admission duration | 0.90 | 0.88 to 0.93 | <0.001 |

**Supplementary Table 14:** Unadjusted Cox Proportional Hazards Model, time to colonisation with any organism in neonates exposed to antibiotics prior to first positive screening colonisation swab

| **Variable** | **Hazard ratio** | **Confidence interval** | **p-value** |
| --- | --- | --- | --- |
| Neonatal antibiotic exposure prior to swab | 0.18 | 0.12 to 0.28 | <0.001 |

**Supplementary Table 15:** Adjusted Cox Proportional Hazards Model, time to colonisation with any organism in neonates exposed to antibiotics prior to first positive screening colonisation swab

| **Variable** | **Hazard ratio** | **Confidence interval** | **p-value** |
| --- | --- | --- | --- |
| Neonatal antibiotic exposure prior to swab | 0.63 | 0.32 to 1.23 | 0.17 |
| NICU Admission | 0.16 | 0.07 to 0.41 | <0.001 |
| Admission duration | 0.91 | 0.88 to 0.93 | <0.001 |

**Supplementary Table 15:** Positive environmental swabs

| **Environmental Site**  **(20 samples collected per site)** | **ESBL** | **CRE** | **CR-GN** |
| --- | --- | --- | --- |
| Handwashing Sink | 1 (5.0%) | 1 (5.0%) | 8 (40.0%) |
| Computer Keyboard | 4 (20.0%) | 0 (0.0%) | 5 (25.0%) |
| Pulse Oximeter | 3 (15.0%) | 0 (0.0%) | 2 (10.0%) |
| Tip Of Hand sanitiser | 1 (5.0%) | 0 (0.0%) | 1 (5.0%) |
| Under Cot | 1 (5.0%) | 0 (0.0%) | 2 (10.0%) |
| Water reservoir of humidifier | 1 (5.0%) | 0 (0.0%) | 1 (5.0%) |
| **Total** | **11** | **1** | **19** |

**Supplementary Table 16**: Classification of pathogenic versus innocuous bacteria

| **Pathogen vs contaminant classification** | |  |  |
| --- | --- | --- | --- |
| **DEFINITE pathogen** | **PROBABLE pathogen** | **POSSIBLE pathogen** | **Likely contaminant** |
| **Include** | **Include** | **Include** if clinically symptomatic and no other pathogen identified | **Exclude** |
| *Acinetobacter* spp. | *Streptococcus viridians* | Coagulase-negative staphylococci | Arcanobacterium |
| *Aeromonas* spp. | *Candida* spp. | Corynebacterium jeikeium | Arthrobacter |
| *Campylobacter jejuni* | *Morganella morganii* |  | *Arthrobacter oxydans* |
| *Citrobacter* spp. | *Nocardia* spp. |  | *Bacillus megaterium* |
| *Elizabethkingia meingosepticum* | *Moraxella* spp. |  | *Bacillus pumilus* |
| *Enterobacter* spp. |  |  | *Bacillus subtilis* |
| Enterococcus spp. |  |  | *Cellulosimicrobium cellulans* |
| *Escherichia coli* |  |  | *Corynebacterium amycolatum* |
| Group A streptococcus |  |  | *Corynebacterium freneyi* |
| Group B streptococcus |  |  | Cutibacterium |
| Group D streptococcus |  |  | Dermabacter |
| *Haemophilis influenzae* |  |  | Diphtheroid |
| *Klebsiella penumoniae* |  |  | *Exiguobacterium* |
| *Listeria monocytogenes* |  |  | *Geobacillus* |
| *Neisseria meningitidis* |  |  | *Helcobacillus* |
| *Proteus mirabilis* |  |  | *Janibacter* |
| *Pseudomonas aeruginosa* |  |  | *Knoellia* |
| *Salmonella* spp. |  |  | *Kocuria marina* |
| *Serratia marcescens* |  |  | *Kocuria palustris* |
| *Shigella* spp. |  |  | *Leifsonia* |
| *Staphylococcus aureus* |  |  | *Lysinibacillus boronitolerans* |
| *Streptococcus penumoniae* |  |  | *Microbacterium arborescens* |
|  |  |  | *Microbacterium barkeri* |
|  |  |  | *Microbacterium paraoxydans* |
|  |  |  | *Microbacterium testaceum* |
|  |  |  | *Micrococcus luteus* |
|  |  |  | *Nesterenkonia* |
|  |  |  | *Paenibacillus* |
|  |  |  | *Paenibacillus amylolyticus* |
|  |  |  | *Propionibacterium* |
|  |  |  | *Pseudoclavibacter* |
|  |  |  | *Exiguobacterium* |
| Based on published data from:  1. Hossain, Belal MSc; Weber, Martin W. *et* *al*.  Classification of Blood Culture Isolates Into Contaminants and Pathogens on the Basis of Clinical and Laboratory Data. The Pediatric Infectious Disease Journal 35(5):p S52-S54, May 2016.  2.Milton, Rebecca; Odumade, Oludare *et al.* Neonatal sepsis and mortality in low-income and middle-income countries from a facility-based birth cohort: an international multisite prospective observational study, The Lancet Global Health;10(5):e661-e672. May 2022.  3. Russell N, Stohr W, Plakkal N, Cook A…*et al.* Patterns of antibiotic use, pathogens and prediction of mortality in hospitalised neonates and young infants with sepsis: A global neonatal sepsis observational cohort study (NeoOBS). PLoS Med, 2003, 20(6). | | | |

| **Supplementary Table 17**: Demographic and clinical variables collected for enrolled mother-infant dyads | | | |
| --- | --- | --- | --- |
| **Variable / Field Name** | **Section Header** | **Field Label** | **Options** |
| **mat_dob** | Demographic & socioeconomic details: | Mothers date of birth (DOB): |  |
| **mat_weight_preg** |  | Mothers pre-pregnancy weight (estimated) (Kg): |  |
| **mat_weight_now** |  | Mothers current weight (estimated) (Kg): |  |
| **mat_height** |  | Mother's pre-pregnancy height (estimated) (cm): |  |
| **mat_edu** |  | Mother's highest level of education: | 0, None | 1, Primary | 2, Secondary | 3, Tertiary | 99, Unknown |
| **mat_emp** |  | Mother's employment status: | 0, Unemployed | 1, Household duties | 2, Student | 3, Civil Worker | 4, Manual work, including farming/fishing | 99, Unknown |
| **hh_income** |  | Estimated combined monthly household income: |  |
| **hh_income_cur** |  | Currency of estimated monthly household income: | 0, Indonesian rupiah | 1, Philippine peso | 2, United States Dollars (USD) | 99, Unknown |
| **hh_location** |  | Household location: | 0, Rural | 1, Peri-urban | 2, Urban | 99, Unknown |
| **hh_pop** |  | Number of household members (including mother & enrolled infants): |  |
| **hh_rooms** |  | Number of household rooms: |  |
| **hh_water** |  | [Household water service-level:](https://redcap.sydney.edu.au/redcap_v13.4.10/DataEntry/image_view.php?pid=19717&id=1179005&doc_id_hash=cdf8142f69f00b83ede7e2636db53d420ac98833) | 1, Safely Managed | 2, Basic | 3, Limited | 4, Unimproved | 5, Surface Water | 99, Unknown |
| **hh_toilet** |  | Household toilet service: | 1, Safely Managed | 2, Basic | 3, Limited | 4, Unimproved | 5, Open Defecation | 99, Unknown |
| **hh_hwashing** |  | Household handwashing access: | 1, Basic | 2, Limited | 3, No Facility | 99, Unknown |
| **hh_bath** |  | Access to bathing: days per week | 0, 0 | 1, 1 | 2, 2 | 3, 3 | 4, 4 | 5, 5 | 6, 6 | 7, 7 | 99, Unknown |
| **mat_comorb_details** |  | Maternal co-morbidity details: |  |
| **mat_smoker** |  | Smoking status: | 1, Non-smoker | 2, Smoked pre-pregnancy but not during | 3, Smoked pre- and during pregnancy | 99, Unknown |
| **mother_outdoors** |  | Regular outdoor activities during pregnancy: | 1, Yes | 0, No | 99, Unknown |
| **gravida** |  |  |  |
| **parity** |  |  |  |
| **antenatal_care** | Issues | Antenatal care received in pregnancy: | 1, Yes | 0, No | 99, Unknown |
| **preg_cx** |  | Medical Issues during pregnancy: | 0, Nil | 1, Hypertension | 2, Pre-eclampsia | 3, HELLP syndrome | 4, Gestational diabetes | 5, Thyroid disease | 6, Cholestasis | 7, Anaemia | 8, Congenital anomaly | 9, Breech or other abnormal lie | 10, Other {preg_cx_other} | 99, Unknown |
| **preg_meds2** | Medications: | Medications during pregnancy: | 0, Nil | 1, Folic Acid | 2, Fatty acids/fish oil | 3, Probiotics | 4, Antimicrobials (please add details below) | 5, Other: please specify: {preg_meds} | 99, Unknown |
| **preg_interventions** | Interventions | Any medical interventions During Pregnancy | 0, Nil | 1, Instrumentation (eg. amniocentesis) | 2, Surgery | 3, Other {preg_interventions_other} | 99, Unknown |
| **mat_admit_num** | Hospitalisations | Number of hospitalisations during this pregnancy |  |
| **mat_admit_t** |  | Which trimester did the hospitalisation occur in? |  |
| **mat_preg_abx_num** | Antimicrobials in Pregnancy | 0, 0 | 1, 1 | 2, 2 | 3, 3 | 4, 4 | 5, 5 | 99, Unknown |  |
| **mat_preg_abx1** |  | Antimicrobial 1: | 1, ANTIBIOTICS | 2, Amikacin | 3, Amoxicillin | 4, Amoxicillin with clavulanic acid | 5, Ampicillin | 6, Azithromycin | 7, Aztreonam | 8, Benzathine benzylpenicillin | 9, Benzylpenicillin | 10, Cefepime | 11, Cefixime | 12, Cefotaxime | 13, Ceftaroline | 14, Ceftazidime | 15, Ceftriaxone | 16, Cephalexin | 17, Cephazolin | 18, Chloramphenicol | 19, Ciprofloxacin | 20, Clarithromycin | 21, Clindamycin | 22, Cloxacillin | 23, Colistin | 24, Daptomycin | 25, Doxycycline | 26, Erythromycin | 27, Ethambutol | 28, Faropenem | 29, Fosfomycin | 30, Gentamicin | 31, Imipenem and cilastatin | 32, Isoniazid | 33, Levofloxacin | 34, Linezolid | 35, Meropenem | 36, Metronidazole | 37, Nitrofurantoin | 38, Phenoxymethylpenicillin | 39, Piperacillin-tazobactam | 40, Polymixin B | 41, Procaine benzylpenicillin | 42, Pyrazinamide | 43, Rifampicin | 44, Spectinomycin | 45, Sulfamethoxazole-trimethoprim | 46, Teicoplanin | 47, Tigecycline | 48, Vancomycin | 49, ANTIFUNGALS | 50, Amphotericin B | 51, Anidulafungin | 52, Caspofungin | 53, Flucytosine | 54, Fluconazole | 55, Itraconazole | 56, Micafungin | 57, Posaconazole | 58, Voriconazole | 59, ANTIVIRALS | 60, Abacavir (ABC) | 61, Aciclovir | 62, Dolutegravir (DTG) | 63, Emtricitabine (FTC) | 64, Efavirenz (EFV) | 65, Foscarnet | 66, Ganciclovir | 67, Lamivudine (3TC) | 68, Lopinavir/ritonavir (LPV/r) | 69, Nevirapine (NVP) | 70, Raltegravir (RAL) | 71, Tenofovir | 72, Valganciclovir | 73, Zidovudine (AZT) | 98, Other - please specify | 99, Unknown |
| **mat_preg_abx1_other** |  | Antimicrobial 1 Other - name: |  |
| **mat_preg_abx1_ind** |  | Antimicrobial 1 Indication: | 1, Community-acquired infection (symptoms present on, or within 48hrs of admission) | 2, Hospital-acquired infection (symptoms started >48h after admission) | 3, Medical prophylaxis | 4, Surgical prophylaxis | 99, Unknown |
| **mat_preg_abx1_dx** |  | Antimicrobial 1 Diagnosis: | 1, Chorioamnionitis | 2, Risk factors for chorioamnionitis (eg. Prolonged rupture of membranes) | 3, Sepsis/Bacteraemia | 4, Probable or proven venous line-related bloodstream infection | 5, Urinary tract infection | 6, Upper respiratory tract infection | 7, Proven or probable lower respiratory tract infection | 8, CNS infection (clinical or microbiologically confirmed) | 9, Treatment for surgical disease | 10, Skin or soft tissue infection | 11, Bone or joint infection | 12, Gastrointestinal infection | 13, Malaria | 14, Pyrexia of unknown origin | 15, HIV | 16, TB | 98, Other - please specify {mat_preg_abx1_dx_other} | 99, Unknown |
| **mat_preg_abx1_dx_other** |  | Antibiotic 1 Diagnosis (Other): |  |
| **mat_preg_abx1_dur** |  | Antimicrobial 1 Duration: | 1, ≤5 days | 2, 6-10 days | 3, >10 days | 99, Unknown |
| **mat_preg_abx2** |  | Antimicrobial 2: | 1, ANTIBIOTICS | 2, Amikacin | 3, Amoxicillin | 4, Amoxicillin with clavulanic acid | 5, Ampicillin | 6, Azithromycin | 7, Aztreonam | 8, Benzathine benzylpenicillin | 9, Benzylpenicillin | 10, Cefepime | 11, Cefixime | 12, Cefotaxime | 13, Ceftaroline | 14, Ceftazidime | 15, Ceftriaxone | 16, Cephalexin | 17, Cephazolin | 18, Chloramphenicol | 19, Ciprofloxacin | 20, Clarithromycin | 21, Clindamycin | 22, Cloxacillin | 23, Colistin | 24, Daptomycin | 25, Doxycycline | 26, Erythromycin | 27, Ethambutol | 28, Faropenem | 29, Fosfomycin | 30, Gentamicin | 31, Imipenem and cilastatin | 32, Isoniazid | 33, Levofloxacin | 34, Linezolid | 35, Meropenem | 36, Metronidazole | 37, Nitrofurantoin | 38, Phenoxymethylpenicillin | 39, Piperacillin-tazobactam | 40, Polymixin B | 41, Procaine benzylpenicillin | 42, Pyrazinamide | 43, Rifampicin | 44, Spectinomycin | 45, Sulfamethoxazole-trimethoprim | 46, Teicoplanin | 47, Tigecycline | 48, Vancomycin | 49, ANTIFUNGALS | 50, Amphotericin B | 51, Anidulafungin | 52, Caspofungin | 53, Flucytosine | 54, Fluconazole | 55, Itraconazole | 56, Micafungin | 57, Posaconazole | 58, Voriconazole | 59, ANTIVIRALS | 60, Abacavir (ABC) | 61, Aciclovir | 62, Dolutegravir (DTG) | 63, Emtricitabine (FTC) | 64, Efavirenz (EFV) | 65, Foscarnet | 66, Ganciclovir | 67, Lamivudine (3TC) | 68, Lopinavir/ritonavir (LPV/r) | 69, Nevirapine (NVP) | 70, Raltegravir (RAL) | 71, Tenofovir | 72, Valganciclovir | 73, Zidovudine (AZT) | 98, Other - please specify | 99, Unknown |
| **mat_preg_abx2_other** |  | Antimicrobial 2 Other - name: |  |
| **mat_preg_abx2_ind** |  | Antibiotic 2 Indication: | 1, Community-acquired infection (symptoms present on, or within 48hrs of admission) | 2, Hospital-acquired infection (symptoms started >48h after admission) | 3, Medical prophylaxis | 4, Surgical prophylaxis | 99, Unknown |
| **mat_preg_abx2_dx** |  | Antibiotic 2 Diagnosis: | 1, Chorioamnionitis | 2, Risk factors for chorioamnionitis (eg. Prolonged rupture of membranes) | 3, Sepsis/Bacteraemia | 4, Probable or proven venous line-related bloodstream infection | 5, Urinary tract infection | 6, Upper respiratory tract infection | 7, Proven or probable lower respiratory tract infection | 8, CNS infection (clinical or microbiologically confirmed) | 9, Treatment for surgical disease | 10, Skin or soft tissue infection | 11, Bone or joint infection | 12, Gastrointestinal infection | 13, Malaria | 14, Pyrexia of unknown origin | 98, Other - please specify {mat_preg_abx2_dx_other} | 99, Unknown |
| **mat_preg_abx2_dx_other** |  | Antibiotic 2 Diagnosis (Other): |  |
| **mat_preg_abx2_dur** |  | Antimicrobial 2 Duration: | 1, ≤5 days | 2, 6-10 days | 3, >10 days | 99, Unknown |
| **mat_preg_abx3** |  | Antimicrobial 3: | 1, ANTIBIOTICS | 2, Amikacin | 3, Amoxicillin | 4, Amoxicillin with clavulanic acid | 5, Ampicillin | 6, Azithromycin | 7, Aztreonam | 8, Benzathine benzylpenicillin | 9, Benzylpenicillin | 10, Cefepime | 11, Cefixime | 12, Cefotaxime | 13, Ceftaroline | 14, Ceftazidime | 15, Ceftriaxone | 16, Cephalexin | 17, Cephazolin | 18, Chloramphenicol | 19, Ciprofloxacin | 20, Clarithromycin | 21, Clindamycin | 22, Cloxacillin | 23, Colistin | 24, Daptomycin | 25, Doxycycline | 26, Erythromycin | 27, Ethambutol | 28, Faropenem | 29, Fosfomycin | 30, Gentamicin | 31, Imipenem and cilastatin | 32, Isoniazid | 33, Levofloxacin | 34, Linezolid | 35, Meropenem | 36, Metronidazole | 37, Nitrofurantoin | 38, Phenoxymethylpenicillin | 39, Piperacillin-tazobactam | 40, Polymixin B | 41, Procaine benzylpenicillin | 42, Pyrazinamide | 43, Rifampicin | 44, Spectinomycin | 45, Sulfamethoxazole-trimethoprim | 46, Teicoplanin | 47, Tigecycline | 48, Vancomycin | 49, ANTIFUNGALS | 50, Amphotericin B | 51, Anidulafungin | 52, Caspofungin | 53, Flucytosine | 54, Fluconazole | 55, Itraconazole | 56, Micafungin | 57, Posaconazole | 58, Voriconazole | 59, ANTIVIRALS | 60, Abacavir (ABC) | 61, Aciclovir | 62, Dolutegravir (DTG) | 63, Emtricitabine (FTC) | 64, Efavirenz (EFV) | 65, Foscarnet | 66, Ganciclovir | 67, Lamivudine (3TC) | 68, Lopinavir/ritonavir (LPV/r) | 69, Nevirapine (NVP) | 70, Raltegravir (RAL) | 71, Tenofovir | 72, Valganciclovir | 73, Zidovudine (AZT) | 98, Other - please specify | 99, Unknown |
| **mat_preg_abx3_other** |  | Antimicrobial 3 Other - name: |  |
| **mat_preg_abx3_ind** |  | Antibiotic 3 Indication: | 1, Community-acquired infection (symptoms present on, or within 48hrs of admission) | 2, Hospital-acquired infection (symptoms started >48h after admission) | 3, Medical prophylaxis | 4, Surgical prophylaxis | 99, Unknown |
| **mat_preg_abx3_dx** |  | Antibiotic 3 Diagnosis: | 1, Chorioamnionitis | 2, Risk factors for chorioamnionitis (eg. Prolonged rupture of membranes) | 3, Sepsis/Bacteraemia | 4, Probable or proven venous line-related bloodstream infection | 5, Urinary tract infection | 6, Upper respiratory tract infection | 7, Proven or probable lower respiratory tract infection | 8, CNS infection (clinical or microbiologically confirmed) | 9, Treatment for surgical disease | 10, Skin or soft tissue infection | 11, Bone or joint infection | 12, Gastrointestinal infection | 13, Malaria | 14, Pyrexia of unknown origin | 98, Other - please specify {mat_preg_abx3_dx_other} | 99, Unknown |
| **mat_preg_abx3_dx_other** |  | Antibiotic 3 Diagnosis (Other): |  |
| **mat_preg_abx3_dur** |  | Antimicrobial 3 Duration: | 1, ≤5 days | 2, 6-10 days | 3, >10 days | 99, Unknown |
| **mat_preg_abx4** |  | Antimicrobial 4: | 1, ANTIBIOTICS | 2, Amikacin | 3, Amoxicillin | 4, Amoxicillin with clavulanic acid | 5, Ampicillin | 6, Azithromycin | 7, Aztreonam | 8, Benzathine benzylpenicillin | 9, Benzylpenicillin | 10, Cefepime | 11, Cefixime | 12, Cefotaxime | 13, Ceftaroline | 14, Ceftazidime | 15, Ceftriaxone | 16, Cephalexin | 17, Cephazolin | 18, Chloramphenicol | 19, Ciprofloxacin | 20, Clarithromycin | 21, Clindamycin | 22, Cloxacillin | 23, Colistin | 24, Daptomycin | 25, Doxycycline | 26, Erythromycin | 27, Ethambutol | 28, Faropenem | 29, Fosfomycin | 30, Gentamicin | 31, Imipenem and cilastatin | 32, Isoniazid | 33, Levofloxacin | 34, Linezolid | 35, Meropenem | 36, Metronidazole | 37, Nitrofurantoin | 38, Phenoxymethylpenicillin | 39, Piperacillin-tazobactam | 40, Polymixin B | 41, Procaine benzylpenicillin | 42, Pyrazinamide | 43, Rifampicin | 44, Spectinomycin | 45, Sulfamethoxazole-trimethoprim | 46, Teicoplanin | 47, Tigecycline | 48, Vancomycin | 49, ANTIFUNGALS | 50, Amphotericin B | 51, Anidulafungin | 52, Caspofungin | 53, Flucytosine | 54, Fluconazole | 55, Itraconazole | 56, Micafungin | 57, Posaconazole | 58, Voriconazole | 59, ANTIVIRALS | 60, Abacavir (ABC) | 61, Aciclovir | 62, Dolutegravir (DTG) | 63, Emtricitabine (FTC) | 64, Efavirenz (EFV) | 65, Foscarnet | 66, Ganciclovir | 67, Lamivudine (3TC) | 68, Lopinavir/ritonavir (LPV/r) | 69, Nevirapine (NVP) | 70, Raltegravir (RAL) | 71, Tenofovir | 72, Valganciclovir | 73, Zidovudine (AZT) | 98, Other - please specify | 99, Unknown |
| **mat_preg_abx4_other** |  | Antimicrobial 4 Other - name: |  |
| **mat_preg_abx4_ind** |  | Antimicrobial 4 Indication: | 1, Community-acquired infection (symptoms present on, or within 48hrs of admission) | 2, Hospital-acquired infection (symptoms started >48h after admission) | 3, Medical prophylaxis | 4, Surgical prophylaxis | 99, Unknown |
| **mat_preg_abx4_dx** |  | Antimicrobial 4 Diagnosis: | 1, Chorioamnionitis | 2, Risk factors for chorioamnionitis (eg. Prolonged rupture of membranes) | 3, Sepsis/Bacteraemia | 4, Probable or proven venous line-related bloodstream infection | 5, Urinary tract infection | 6, Upper respiratory tract infection | 7, Proven or probable lower respiratory tract infection | 8, CNS infection (clinical or microbiologically confirmed) | 9, Treatment for surgical disease | 10, Skin or soft tissue infection | 11, Bone or joint infection | 12, Gastrointestinal infection | 13, Malaria | 14, Pyrexia of unknown origin | 98, Other - please specify {mat_preg_abx4_dx_other} | 99, Unknown |
| **mat_preg_abx4_dx_other** |  | Antimicrobial 4 Diagnosis (Other): |  |
| **mat_preg_abx4_dur** |  | Antimicrobial 4 Duration: | 1, ≤5 days | 2, 6-10 days | 3, >10 days | 99, Unknown |
| **mat_preg_abx5** |  | Antimicrobial 5: | 1, ANTIBIOTICS | 2, Amikacin | 3, Amoxicillin | 4, Amoxicillin with clavulanic acid | 5, Ampicillin | 6, Azithromycin | 7, Aztreonam | 8, Benzathine benzylpenicillin | 9, Benzylpenicillin | 10, Cefepime | 11, Cefixime | 12, Cefotaxime | 13, Ceftaroline | 14, Ceftazidime | 15, Ceftriaxone | 16, Cephalexin | 17, Cephazolin | 18, Chloramphenicol | 19, Ciprofloxacin | 20, Clarithromycin | 21, Clindamycin | 22, Cloxacillin | 23, Colistin | 24, Daptomycin | 25, Doxycycline | 26, Erythromycin | 27, Ethambutol | 28, Faropenem | 29, Fosfomycin | 30, Gentamicin | 31, Imipenem and cilastatin | 32, Isoniazid | 33, Levofloxacin | 34, Linezolid | 35, Meropenem | 36, Metronidazole | 37, Nitrofurantoin | 38, Phenoxymethylpenicillin | 39, Piperacillin-tazobactam | 40, Polymixin B | 41, Procaine benzylpenicillin | 42, Pyrazinamide | 43, Rifampicin | 44, Spectinomycin | 45, Sulfamethoxazole-trimethoprim | 46, Teicoplanin | 47, Tigecycline | 48, Vancomycin | 49, ANTIFUNGALS | 50, Amphotericin B | 51, Anidulafungin | 52, Caspofungin | 53, Flucytosine | 54, Fluconazole | 55, Itraconazole | 56, Micafungin | 57, Posaconazole | 58, Voriconazole | 59, ANTIVIRALS | 60, Abacavir (ABC) | 61, Aciclovir | 62, Dolutegravir (DTG) | 63, Emtricitabine (FTC) | 64, Efavirenz (EFV) | 65, Foscarnet | 66, Ganciclovir | 67, Lamivudine (3TC) | 68, Lopinavir/ritonavir (LPV/r) | 69, Nevirapine (NVP) | 70, Raltegravir (RAL) | 71, Tenofovir | 72, Valganciclovir | 73, Zidovudine (AZT) | 98, Other - please specify | 99, Unknown |
| **mat_preg_abx5_other** |  | Antimicrobial 5 Other - name: |  |
| **mat_preg_abx5_ind** |  | Antimicrobial 5 Indication: | 1, Community-acquired infection (symptoms present on, or within 48hrs of admission) | 2, Hospital-acquired infection (symptoms started >48h after admission) | 3, Medical prophylaxis | 4, Surgical prophylaxis | 99, Unknown |
| **mat_preg_abx5_dx** |  | Antimicrobial 5 Diagnosis: | 1, Chorioamnionitis | 2, Risk factors for chorioamnionitis (eg. Prolonged rupture of membranes) | 3, Sepsis/Bacteraemia | 4, Probable or proven venous line-related bloodstream infection | 5, Urinary tract infection | 6, Upper respiratory tract infection | 7, Proven or probable lower respiratory tract infection | 8, CNS infection (clinical or microbiologically confirmed) | 9, Treatment for surgical disease | 10, Skin or soft tissue infection | 11, Bone or joint infection | 12, Gastrointestinal infection | 13, Malaria | 14, Pyrexia of unknown origin | 98, Other - please specify {mat_preg_abx5_dx_other} | 99, Unknown |
| **mat_preg_abx5_dx_other** |  | Antimicrobial 5 Diagnosis (Other): |  |
| **mat_preg_abx5_dur** |  | Antimicrobial 5 Duration: | 1, ≤5 days | 2, 6-10 days | 3, >10 days | 99, Unknown |
| **birth_onsite** | Peri-partum period | Did the birth take place at the study hospital? |  |
| **birth_admit_time** |  | Date/Time of maternal admission for the birth: |  |
| **mat_fever** |  | Highest Maternal Temperature (degrees Celsius): |  |
| **fetal_distress** |  | Foetal distress or Non-reassuring CTG: | 1, Yes | 0, No | 99, Unknown |
| **rom** |  | Rupture of Membranes: | 0, Spontaneous rupture of membranes (SROM) | 1, Artificial rupture of membranes (AROM) |
| **rom_time** |  | Rupture of Membrane (Date/Time): |  |
| **rom_duration** |  | Rupture of Membrane Duration (Hours) (Calculated): | (datediff([rom_time], [dob], 'h')) |
| **mecliquor** |  | Meconium staining of liquor: | 1, Yes | 0, No | 99, Unknown |
| **malodor_liquor** |  | Malodorous liquor: | 1, Yes | 0, No | 99, Unknown |
| **mum_steroids** |  | Was the mother given antenatal steroids prior to delivery? | 1, Yes | 0, No | 99, Unknown |
| **mgso4** |  | Was the mother given antenatal Magnesium Sulphate prior to delivery? | 1, Yes | 0, No | 99, Unknown |
| **birth_type** | Birth Details | Delivery Type: | 1, Vaginal (SVD/NVD) | 2, Vaginal assisted (ventouse/forceps) | 3, Elective LSCS (Lower-section caesarean section) | 4, Emergency LSCS (Lower-section caesarean section) |
| **birth_location** |  | Delivery location: | 1, Hospital | 2, Health centre | 3, Home |
| **liveborne** |  | Live-borne infant: |  |
| **dob** |  | Date/Time of Infant Birth: |  |
| **sex** |  | Sex: | 1, Female | 2, Male | 3, Indeterminant |
| **bwt** |  | Birthweight (grams): |  |
| **gestation** |  | Gestational Age (completed weeks): |  |
| **apgar_1** |  | Apgar Score at 1 minute |  |
| **apgar_5** |  | Apgar Score at 5 minutes |  |
| **apgar_10** |  | Apgar Score at 10 minutes |  |
| **neonatal_resus** |  | Resuscitation required at birth: |  |
| **birth_skintoskin** |  | Estimated time to first skin to skin (hours): |  |
| **birth_abx_num** | Antibiotic Use (Mother) | 0, 0 | 1, 1 | 2, 2 | 3, 3 | 4, 4 | 5, 5 | 99, Unknown |  |
| **birth_abx_bc_collect** |  | Were blood cultures collected prior to commencing antimicrobials? | 1, Yes | 0, No | 99, Unknown |
| **birth_abx1** |  | Antimicrobial 1: | 1, ANTIBIOTICS | 2, Amikacin | 3, Amoxicillin | 4, Amoxicillin with clavulanic acid | 5, Ampicillin | 6, Azithromycin | 7, Aztreonam | 8, Benzathine benzylpenicillin | 9, Benzylpenicillin | 10, Cefepime | 11, Cefixime | 12, Cefotaxime | 13, Ceftaroline | 14, Ceftazidime | 15, Ceftriaxone | 16, Cephalexin | 17, Cephazolin | 18, Chloramphenicol | 19, Ciprofloxacin | 20, Clarithromycin | 21, Clindamycin | 22, Cloxacillin | 23, Colistin | 24, Daptomycin | 25, Doxycycline | 26, Erythromycin | 27, Ethambutol | 28, Faropenem | 29, Fosfomycin | 30, Gentamicin | 31, Imipenem and cilastatin | 32, Isoniazid | 33, Levofloxacin | 34, Linezolid | 35, Meropenem | 36, Metronidazole | 37, Nitrofurantoin | 38, Phenoxymethylpenicillin | 39, Piperacillin-tazobactam | 40, Polymixin B | 41, Procaine benzylpenicillin | 42, Pyrazinamide | 43, Rifampicin | 44, Spectinomycin | 45, Sulfamethoxazole-trimethoprim | 46, Teicoplanin | 47, Tigecycline | 48, Vancomycin | 49, ANTIFUNGALS | 50, Amphotericin B | 51, Anidulafungin | 52, Caspofungin | 53, Flucytosine | 54, Fluconazole | 55, Itraconazole | 56, Micafungin | 57, Posaconazole | 58, Voriconazole | 59, ANTIVIRALS | 60, Abacavir (ABC) | 61, Aciclovir | 62, Dolutegravir (DTG) | 63, Emtricitabine (FTC) | 64, Efavirenz (EFV) | 65, Foscarnet | 66, Ganciclovir | 67, Lamivudine (3TC) | 68, Lopinavir/ritonavir (LPV/r) | 69, Nevirapine (NVP) | 70, Raltegravir (RAL) | 71, Tenofovir | 72, Valganciclovir | 73, Zidovudine (AZT) | 98, Other - please specify | 99, Unknown |
| **birth_abx1_other** |  | Antimicrobial 1 - Other: |  |
| **birth_abx1_dose** |  | Antimicrobial 1 Dose: |  |
| **birth_abx1_doseunit** |  | Antimicrobial 1 Dose Units: | 1, mg | 2, mg/kg | 3, mcg | 4, mcg/kg | 5, IU |
| **birth_abx1_freq** |  | Antimicrobial 1: Frequency of dose | 1, Daily | 2, Twice daily | 3, Three times daily | 4, Four times daily | 5, Continuous infusion | 6, Once |
| **birth_abx1_route** |  | Antimicrobial 1: Route of administration | 1, Oral | 2, Intravenous | 3, Intramuscular | 4, Topical | 98, Other |
| **birth_abx1_inf** |  | Antimicrobial 1: Was the intravenous antimicrobial given as a prolonged infusion? |  |
| **birth_abx1_ind** |  | Antimicrobial 1 Indication: | 1, Community-acquired infection (symptoms present on, or within 48hrs of admission) | 2, Hospital-acquired infection (symptoms started >48h after admission) | 3, Medical prophylaxis | 4, Surgical prophylaxis | 99, Unknown |
| **birth_abx1_dx** |  | Antimicrobial 1 Dx: | 1, Chorioamnionitis | 2, Risk factors for chorioamnionitis (eg. Prolonged rupture of membranes) | 3, Sepsis/Bacteraemia | 4, Probable or proven venous line-related bloodstream infection | 5, Urinary tract infection | 6, Upper respiratory tract infection | 7, Proven or probable lower respiratory tract infection | 8, CNS infection (clinical or microbiologically confirmed) | 9, Treatment for surgical disease | 10, Skin or soft tissue infection | 11, Bone or joint infection | 12, Gastrointestinal infection | 13, Malaria | 14, Pyrexia of unknown origin | 98, Other - please specify {birth_abx1_dx_other} | 99, Unknown |
| **birth_abx1_dx_other** |  | Antimicrobial 1 Diagnosis (Other): |  |
| **birth_abx1_start** |  | Antimicrobial 1 Start: |  |
| **birth_abx1_stop** |  | Antimicrobial 1 Stop: |  |
| **birth_abx1_dur** |  | Antimicrobial 1 Duration (days): |  |
| **birth_abx1_change** |  | Antimicrobial 1: Reason for stopping or changing antimicrobial: | 1, Course completed | 2, Clinical resolution | 3, Normalisation of inflammatory markers | 4, Clinical deterioration | 5, New clinical event/ diagnosis | 6, Drug toxicity | 7, Drug allergy | 8, Drug error | 9, Drug out of stock | 10, Microbiology result obtained: gram stain/ID | 11, Microbiology result obtained: susceptibility | 12, Microbiology result obtained: negative culture | 13, Imaging result | 14, Therapeutic drug monitoring | 15, Patient transferred | 16, Patient died | 17, Other |
| **birth_abx2** |  | Antimicrobial 2: | 1, ANTIBIOTICS | 2, Amikacin | 3, Amoxicillin | 4, Amoxicillin with clavulanic acid | 5, Ampicillin | 6, Azithromycin | 7, Aztreonam | 8, Benzathine benzylpenicillin | 9, Benzylpenicillin | 10, Cefepime | 11, Cefixime | 12, Cefotaxime | 13, Ceftaroline | 14, Ceftazidime | 15, Ceftriaxone | 16, Cephalexin | 17, Cephazolin | 18, Chloramphenicol | 19, Ciprofloxacin | 20, Clarithromycin | 21, Clindamycin | 22, Cloxacillin | 23, Colistin | 24, Daptomycin | 25, Doxycycline | 26, Erythromycin | 27, Ethambutol | 28, Faropenem | 29, Fosfomycin | 30, Gentamicin | 31, Imipenem and cilastatin | 32, Isoniazid | 33, Levofloxacin | 34, Linezolid | 35, Meropenem | 36, Metronidazole | 37, Nitrofurantoin | 38, Phenoxymethylpenicillin | 39, Piperacillin-tazobactam | 40, Polymixin B | 41, Procaine benzylpenicillin | 42, Pyrazinamide | 43, Rifampicin | 44, Spectinomycin | 45, Sulfamethoxazole-trimethoprim | 46, Teicoplanin | 47, Tigecycline | 48, Vancomycin | 49, ANTIFUNGALS | 50, Amphotericin B | 51, Anidulafungin | 52, Caspofungin | 53, Flucytosine | 54, Fluconazole | 55, Itraconazole | 56, Micafungin | 57, Posaconazole | 58, Voriconazole | 59, ANTIVIRALS | 60, Abacavir (ABC) | 61, Aciclovir | 62, Dolutegravir (DTG) | 63, Emtricitabine (FTC) | 64, Efavirenz (EFV) | 65, Foscarnet | 66, Ganciclovir | 67, Lamivudine (3TC) | 68, Lopinavir/ritonavir (LPV/r) | 69, Nevirapine (NVP) | 70, Raltegravir (RAL) | 71, Tenofovir | 72, Valganciclovir | 73, Zidovudine (AZT) | 98, Other - please specify | 99, Unknown |
| **birth_abx2_other** |  | Antimicrobial 2 - Other: |  |
| **birth_abx2_dose** |  | Antimicrobial 2 Dose: |  |
| **birth_abx2_doseunit** |  | Antimicrobial 2 Dose Units: | 1, mg | 2, mg/kg | 3, mcg | 4, mcg/kg | 5, IU |
| **birth_abx2_freq** |  | Antimicrobial 2: Frequency of dose | 1, Daily | 2, Twice daily | 3, Three times daily | 4, Four times daily | 5, Continuous infusion | 6, Once |
| **birth_abx2_route** |  | Antimicrobial 2: Route of administration | 1, Oral | 2, Intravenous | 3, Intramuscular | 4, Topical | 98, Other |
| **birth_abx2_inf** |  | Antimicrobial 2: Was the intravenous antimicrobial given as a prolonged infusion? |  |
| **birth_abx2_ind** |  | Antimicrobial 2 Indication: | 1, Community-acquired infection (symptoms present on, or within 48hrs of admission) | 2, Hospital-acquired infection (symptoms started >48h after admission) | 3, Medical prophylaxis | 4, Surgical prophylaxis | 99, Unknown |
| **birth_abx2_dx** |  | Antimicrobial 2 Dx: | 1, Chorioamnionitis | 2, Risk factors for chorioamnionitis (eg. Prolonged rupture of membranes) | 3, Sepsis/Bacteraemia | 4, Probable or proven venous line-related bloodstream infection | 5, Urinary tract infection | 6, Upper respiratory tract infection | 7, Proven or probable lower respiratory tract infection | 8, CNS infection (clinical or microbiologically confirmed) | 9, Treatment for surgical disease | 10, Skin or soft tissue infection | 11, Bone or joint infection | 12, Gastrointestinal infection | 13, Malaria | 14, Pyrexia of unknown origin | 98, Other - please specify {birth_abx2_dx_other} | 99, Unknown |
| **birth_abx2_dx_other** |  | Antimicrobial 2 Diagnosis (Other): |  |
| **birth_abx2_start** |  | Antimicrobial 2 Start: |  |
| **birth_abx2_stop** |  | Antimicrobial 2 Stop: |  |
| **birth_abx2_dur** |  | Antimicrobial 2 Duration (days): |  |
| **birth_abx2_change** |  | Antimicrobial 2: Reason for stopping or changing antimicrobial: | 1, Course completed | 2, Clinical resolution | 3, Normalisation of inflammatory markers | 4, Clinical deterioration | 5, New clinical event/ diagnosis | 6, Drug toxicity | 7, Drug allergy | 8, Drug error | 9, Drug out of stock | 10, Microbiology result obtained: gram stain/ID | 11, Microbiology result obtained: susceptibility | 12, Microbiology result obtained: negative culture | 13, Imaging result | 14, Therapeutic drug monitoring | 15, Patient transferred | 16, Patient died | 17, Other |
| **admit_time** |  | Date/Time of Admission to the NICU: |  |
| **admit_ind** |  | Indication for Admission: |  |
| **admit_source** |  | Admission source: | 0, Birth-suite/delivery room | 1, Operating Theatre | 2, Post natal ward | 3, Other hospital | 4, Home | 5, Other {admission_source_other} |
| **admission_source_other** |  |  |  |
| **nicu_dc_time** |  | Date/Time of Discharge from NICU: |  |
| **nicu_dc_reason** |  | Discharge reason: | 0, Clinical improvement | 1, Patient flow (i.e NICU over capacity) | 2, Transfer to another facility | 3, Deceased | 4, Other |
| **discharge_time** |  | Discharge Time/Date: |  |
| **neonate_admit_duration** |  | Hospital admission duration (birth to discharge): | datediff ([dob], [discharge_time], "d") |
| **dc_dest** |  | Discharge Destination: | 1, Home | 2, Transfer | 3, Deceased |
| **dc_wt** |  | Discharge Weight (grams) |  |
| **issues** | Issues during admission | Issues during admission: | 0, Nil | 1, Congenital Infection (please include an infection episode) | 2, Risk of infection treated with antimicrobials (please include an infection) | 3, Infection (please include an infection episode for each) | 4, Hypoglycaemia requiring intravenous dextrose | 5, Jaundice requiring phototherapy | 6, Haemolysis | 7, Transient Tachypnonea of Newborn | 8, Respiratory Distress Syndrome | 9, Meconium Aspiration Syndrome | 10, Persistent Pulmonary Hypertension (PPHN) | 11, Apnoea | 12, Pneumothorax | 13, Necrotising Enterocolitis | 14, IVH or Stroke | 15, Perinatal Asphyxia | 16, Retinopathy of Prematurity (ROP) | 17, Fracture | 18, Congenital Cardiac Disease | 19, Congenital Respiratory Disease | 20, Congenital GIT Disease | 21, Congenital Renal Disease | 22, Genetic abnormality | 23, Other {issues_other} |
| **issues_other** |  |  |  |
| **bc_tot_num** | Blood Cultures | Number of blood cultures taken during admission: |  |
| **bc_num_pos** |  | Number of positive blood cultures with significant isolates: |  |
| **all_bc_entered** |  | Have all positive and negative blood cultures been added? |  |
| **csf_tot_num** | CSF Cultures | Number of CSF cultures taken during admission: |  |
| **csf_num_sig** |  | Number of positive CSF cultures with significant isolates: |  |
| **all_csf_entered** |  | Have all positive and negative CSF cultures been added? |  |
| **infection_num** | Infections | Number of infection episodes: |  |
| **all_sepsis_entered** |  | Have all infection episodes been added? |  |
| **bf** | Feeding | Ever successfully breastfed: |  |
| **bf_days** |  | Duration of breastfeeding (days): |  |
| **formula** |  | Ever received formula |  |
| **formula_days** |  | Duration of formula (days): |  |
| **donormilk** |  | Ever received donor milk: |  |
| **donormilk_days** |  | Duration of donor milk (days) |  |
| **tpn** |  | Ever received TPN: |  |
| **tpn_duration** |  | Duration of TPN (days): |  |
| **feeding_dc** |  | Feeding on discharge: | 0, Formula | 1, Breastfeeding | 2, Mixed |
| **fortification** |  | Ever received calorie fortification: |  |
| **bottle_fed** |  | Ever fed by a bottle: | 1, Yes | 0, No | 99, Unknown |
| **ng_feeding** |  | Ever received tube feeding (orogastric, nasogastric): |  |
| **ivt** |  | Ever received Intravenous fluids: |  |
| **blood_products** |  | Ever received blood products: |  |
| **kmc** | Protective Measures | Received Kangaroo Care: | 1, Yes | 0, No | 99, Unknown |
| **kmc_duration** |  | Duration receiving Kangaroo care (days): |  |
| **neonate_admit_meds** | Medications | Received the following medications during admission: | 0, Nil | 1, Acid reduction agents (PPI or H2 antagonist) | 2, Probiotics (Bifidobacterium) | 3, Probiotics (Lactobacillus) | 4, Probiotics (Streptococcus) | 5, Probiotics (Other) | 6, Aperients | 7, Vitamin D | 8, Multivitamin | 9, Iron | 10, Steroid | 11, Antimicrobials - please ensure these are all entered into the relevant infection episode | 12, Erythromycin - prokinetic |
| **probiotic_duration** |  | Duration of probiotics (days): |  |
| **vent** | Ventilation | Ventilation received during admission: | 1, No ventilation | 2, Oxygen (eg. Low flow nasal prongs, hudson mask, non-rebreather) | 3, Non-invasive ventilation (eg. HFNP, CPAP, BiPAP) | 4, Invasive Ventilation (eg. Intubation, HFOV) |
| **niv_days** |  | Duration of non-invasive ventilation (days): |  |
| **vent_days** |  | Duration of Invasive ventilation (days): |  |
| **lines** | Intravascular Lines | Lines inserted during admission: | 0, Nil | 1, Peripherally Inserted Vascular Catheter (PIVC/Cannula) | 2, Centrally Vascular Catheter (CVC) | 3, Indwelling Urinary Catheter (IDC) | 5, Intercostal catheter (ICC) | 4, Other Inserted tubes or drains: {lines_other} |
| **lines_other** |  |  |  |
| **cvc_days** |  | Duration central lines in-situ (days): |  |
| **idc_days** |  | Duration urinary catheter in-situ (days): |  |
| **icc_days** |  | Duration ICC in-situ (days): |  |
| **surg** | Surgery: | Received surgery during admission: |  |
| **surg_details** |  | Surgery details: |  |
| **infection_ep_date** |  | Date of Episode: |  |
| **episode_signs** | Clinical Features | Clinical Features: | 1, Tachycardia/Bradycardia | 2, Tachypnoea or Work of Breathing | 3, Apnoea | 4, Temperature Instability | 5, Change in mentation (eg. lethargy, abnormal tone) | 6, Seizures | 7, Hypoglycaemia | 8, Abnormal biomarkers (WCC, CRP, PCT) | 10, Phlebitis | 9, Other {episode_signs_other} |
| **episode_signs_other** |  | Other signs: |  |
| **episode_type** | Diagnosis | Infection Episode Type: | 1, Community-acquired infection (symptoms present on, or within 48hrs of admission) | 2, Hospital-acquired infection (symptoms started >48h after admission) | 3, Medical prophylaxis | 4, Surgical prophylaxis | 99, Unknown |
| **episode_dx** |  | Diagnosis | 1, Risk of sepsis | 2, Presumed sepsis (culture-negative sepsis) | 3, Bacteraemia (culture-positive sepsis) | 4, Probable or proven venous line-related bloodstream infection | 5, Meningoencephalitis | 6, Respiratory tract infection | 7, Necrotising enterocolitis or abdominal infection | 8, Urinary Tract Infection | 9, Skin and soft tissue infection | 10, Bone and Joint infection | 11, Surgical infection prophylaxis | 12, Treatment of surgical infection | 13, Congenital Infection (eg. CMV, Syphilis, HIV) | 14, Other (please specify): {episode_dx_other} |
| **episode_dx_other** |  |  |  |
| **episode_bc_preabx** | Cultures | Was a blood culture collected prior to commencing antibiotics? |  |
| **episode_bc_num** |  | Number of blood cultures collected during this episode: |  |
| **episode_csf_num** |  | Number of CSF samples collected during this episode: |  |
| **episode_cultures_added** |  | Have all blood and CSF cultures been added to the culture episodes? |  |
| **episode_tests_other** |  | Please detail any other diagnostics tests of relevance (eg. sputum, urine, molecular tests, serology) and their results: |  |
| **neonate_abx_num** | Antimicrobials | Number of antimicrobials used in this episode | 0, 0 | 1, 1 | 2, 2 | 3, 3 | 4, 4 | 5, 5 |
| **neonate_abx1** |  | Antimicrobial 1: | 1, ANTIBIOTICS | 2, Amikacin | 3, Amoxicillin | 4, Amoxicillin with clavulanic acid | 5, Ampicillin | 6, Azithromycin | 7, Aztreonam | 8, Benzathine benzylpenicillin | 9, Benzylpenicillin | 10, Cefepime | 11, Cefixime | 12, Cefotaxime | 13, Ceftaroline | 14, Ceftazidime | 15, Ceftriaxone | 16, Cephalexin | 17, Cephazolin | 18, Chloramphenicol | 19, Ciprofloxacin | 20, Clarithromycin | 21, Clindamycin | 22, Cloxacillin | 23, Colistin | 24, Daptomycin | 25, Doxycycline | 26, Erythromycin | 27, Ethambutol | 28, Faropenem | 29, Fosfomycin | 30, Gentamicin | 31, Imipenem and cilastatin | 32, Isoniazid | 33, Levofloxacin | 34, Linezolid | 35, Meropenem | 36, Metronidazole | 37, Nitrofurantoin | 38, Phenoxymethylpenicillin | 39, Piperacillin-tazobactam | 40, Polymixin B | 41, Procaine benzylpenicillin | 42, Pyrazinamide | 43, Rifampicin | 44, Spectinomycin | 45, Sulfamethoxazole-trimethoprim | 46, Teicoplanin | 47, Tigecycline | 48, Vancomycin | 49, ANTIFUNGALS | 50, Amphotericin B | 51, Anidulafungin | 52, Caspofungin | 53, Flucytosine | 54, Fluconazole | 55, Itraconazole | 56, Micafungin | 57, Posaconazole | 58, Voriconazole | 59, ANTIVIRALS | 60, Abacavir (ABC) | 61, Aciclovir | 62, Dolutegravir (DTG) | 63, Emtricitabine (FTC) | 64, Efavirenz (EFV) | 65, Foscarnet | 66, Ganciclovir | 67, Lamivudine (3TC) | 68, Lopinavir/ritonavir (LPV/r) | 69, Nevirapine (NVP) | 70, Raltegravir (RAL) | 71, Tenofovir | 72, Valganciclovir | 73, Zidovudine (AZT) | 98, Other - please specify | 99, Unknown | 74, Ampicillin-sulbactam | 75, Cefoperazone-sulbactam |
| **neonate_abx1_other** |  | Other antimicrobial 1: |  |
| **neonate_abx1_start** |  | Antimicrobial 1 Start: |  |
| **neonate_abx1_stop** |  | Antimicrobial 1 Stop: |  |
| **neonate_abx1_dur** |  | Antimicrobial 1 Duration (days): |  |
| **neonate_abx1_dose** |  | Antimicrobial 1 Dose: |  |
| **neonate_abx1_doseunit** |  | Antimicrobial 1 Dose Unit: | 1, mg | 2, mg/kg | 3, mcg | 4, mcg/kg | 5, IU |
| **neonate_abx1_route** |  | Route: | 1, Oral | 2, Intravenous | 3, Intramuscular | 4, Topical | 98, Other |
| **neo_abx1_inf** |  | Antimicrobial 1: Was the intravenous antimicrobial given as a prolonged infusion? | 1, Yes | 0, No | 99, Unsure |
| **neonate_abx1_frequency** |  | Frequency (doses per day): |  |
| **neonate_abx1_stop_reason** |  | Reason for stopping antimicrobial: | 1, Course completed | 2, Clinical resolution | 3, Normalisation of inflammatory markers | 4, Clinical deterioration | 5, New clinical event / diagnosis | 6, Drug toxicity | 7, Drug allergy | 8, Drug error | 9, Drug out of stock | 10, Microbiology result obtained: gram-stain or identification | 11, Microbiology result obtained: susceptibility | 12, Microbiology result obtained: negative culture | 13, Imaging result | 14, Therapeutic drug monitoring | 15, Patient transferred | 16, Patient died | 98, Other (please specify): | 99, Unknown |
| **neonate_abx1_stop_other** |  |  |  |
| **neonate_abx2** |  | Antimicrobial 2: | 1, ANTIBIOTICS | 2, Amikacin | 3, Amoxicillin | 4, Amoxicillin with clavulanic acid | 5, Ampicillin | 6, Azithromycin | 7, Aztreonam | 8, Benzathine benzylpenicillin | 9, Benzylpenicillin | 10, Cefepime | 11, Cefixime | 12, Cefotaxime | 13, Ceftaroline | 14, Ceftazidime | 15, Ceftriaxone | 16, Cephalexin | 17, Cephazolin | 18, Chloramphenicol | 19, Ciprofloxacin | 20, Clarithromycin | 21, Clindamycin | 22, Cloxacillin | 23, Colistin | 24, Daptomycin | 25, Doxycycline | 26, Erythromycin | 27, Ethambutol | 28, Faropenem | 29, Fosfomycin | 30, Gentamicin | 31, Imipenem and cilastatin | 32, Isoniazid | 33, Levofloxacin | 34, Linezolid | 35, Meropenem | 36, Metronidazole | 37, Nitrofurantoin | 38, Phenoxymethylpenicillin | 39, Piperacillin-tazobactam | 40, Polymixin B | 41, Procaine benzylpenicillin | 42, Pyrazinamide | 43, Rifampicin | 44, Spectinomycin | 45, Sulfamethoxazole-trimethoprim | 46, Teicoplanin | 47, Tigecycline | 48, Vancomycin | 49, ANTIFUNGALS | 50, Amphotericin B | 51, Anidulafungin | 52, Caspofungin | 53, Flucytosine | 54, Fluconazole | 55, Itraconazole | 56, Micafungin | 57, Posaconazole | 58, Voriconazole | 59, ANTIVIRALS | 60, Abacavir (ABC) | 61, Aciclovir | 62, Dolutegravir (DTG) | 63, Emtricitabine (FTC) | 64, Efavirenz (EFV) | 65, Foscarnet | 66, Ganciclovir | 67, Lamivudine (3TC) | 68, Lopinavir/ritonavir (LPV/r) | 69, Nevirapine (NVP) | 70, Raltegravir (RAL) | 71, Tenofovir | 72, Valganciclovir | 73, Zidovudine (AZT) | 98, Other - please specify | 99, Unknown | 74, Ampicillin-sulbactam | 75, Cefoperazone-sulbactam |
| **neonate_abx2_other** |  | Other antimicrobial 2: |  |
| **neonate_abx2_start** |  | Antimicrobial 2 Start: |  |
| **neonate_abx2_stop** |  | Antimicrobial 2 Stop: |  |
| **neonate_abx2_dur** |  | Antimicrobial 2 Duration (days): |  |
| **neonate_abx2_dose** |  | Antimicrobial 2 Dose: |  |
| **neonate_abx2_doseunit** |  | Antimicrobial 2 Dose Unit: | 1, mg | 2, mg/kg | 3, mcg | 4, mcg/kg | 5, IU |
| **neonate_abx2_route** |  | Route: | 1, Oral | 2, Intravenous | 3, Intramuscular | 4, Topical | 98, Other |
| **neo_abx2_inf** |  | Antimicrobial 2: Was the intravenous antimicrobial given as a prolonged infusion? | 1, Yes | 0, No | 99, Unsure |
| **neonate_abx2_frequency** |  | Frequency (doses per day): |  |
| **neonate_abx2_stop_reason** |  | Reason for stopping antimicrobial: | 1, Course completed | 2, Clinical resolution | 3, Normalisation of inflammatory markers | 4, Clinical deterioration | 5, New clinical event / diagnosis | 6, Drug toxicity | 7, Drug allergy | 8, Drug error | 9, Drug out of stock | 10, Microbiology result obtained: gram-stain or identification | 11, Microbiology result obtained: susceptibility | 12, Microbiology result obtained: negative culture | 13, Imaging result | 14, Therapeutic drug monitoring | 15, Patient transferred | 16, Patient died | 98, Other (please specify): | 99, Unknown |
| **neonate_abx2_stop_other** |  |  |  |
| **neonate_abx3** |  | Antimicrobial 3: | 1, ANTIBIOTICS | 2, Amikacin | 3, Amoxicillin | 4, Amoxicillin with clavulanic acid | 5, Ampicillin | 6, Azithromycin | 7, Aztreonam | 8, Benzathine benzylpenicillin | 9, Benzylpenicillin | 10, Cefepime | 11, Cefixime | 12, Cefotaxime | 13, Ceftaroline | 14, Ceftazidime | 15, Ceftriaxone | 16, Cephalexin | 17, Cephazolin | 18, Chloramphenicol | 19, Ciprofloxacin | 20, Clarithromycin | 21, Clindamycin | 22, Cloxacillin | 23, Colistin | 24, Daptomycin | 25, Doxycycline | 26, Erythromycin | 27, Ethambutol | 28, Faropenem | 29, Fosfomycin | 30, Gentamicin | 31, Imipenem and cilastatin | 32, Isoniazid | 33, Levofloxacin | 34, Linezolid | 35, Meropenem | 36, Metronidazole | 37, Nitrofurantoin | 38, Phenoxymethylpenicillin | 39, Piperacillin-tazobactam | 40, Polymixin B | 41, Procaine benzylpenicillin | 42, Pyrazinamide | 43, Rifampicin | 44, Spectinomycin | 45, Sulfamethoxazole-trimethoprim | 46, Teicoplanin | 47, Tigecycline | 48, Vancomycin | 49, ANTIFUNGALS | 50, Amphotericin B | 51, Anidulafungin | 52, Caspofungin | 53, Flucytosine | 54, Fluconazole | 55, Itraconazole | 56, Micafungin | 57, Posaconazole | 58, Voriconazole | 59, ANTIVIRALS | 60, Abacavir (ABC) | 61, Aciclovir | 62, Dolutegravir (DTG) | 63, Emtricitabine (FTC) | 64, Efavirenz (EFV) | 65, Foscarnet | 66, Ganciclovir | 67, Lamivudine (3TC) | 68, Lopinavir/ritonavir (LPV/r) | 69, Nevirapine (NVP) | 70, Raltegravir (RAL) | 71, Tenofovir | 72, Valganciclovir | 73, Zidovudine (AZT) | 98, Other - please specify | 99, Unknown | 74, Ampicillin-sulbactam | 75, Cefoperazone-sulbactam |
| **neonate_abx3_other** |  | Other antimicrobial 3: |  |
| **neonate_abx3_start** |  | Antimicrobial 3 Start: |  |
| **neonate_abx3_stop** |  | Antimicrobial 3 Stop: |  |
| **neonate_abx3_dur** |  | Antimicrobial 3 Duration (days): |  |
| **neonate_abx3_dose** |  | Antimicrobial 3 Dose: |  |
| **neonate_abx3_doseunit** |  | Antimicrobial 3 Dose Unit: | 1, mg | 2, mg/kg | 3, mcg | 4, mcg/kg | 5, IU |
| **neonate_abx3_route** |  | Route: | 1, Oral | 2, Intravenous | 3, Intramuscular | 4, Topical | 98, Other |
| **neo_abx3_inf** |  | Antimicrobial 3: Was the intravenous antimicrobial given as a prolonged infusion? | 1, Yes | 0, No | 99, Unsure |
| **neonate_abx3_frequency** |  | Frequency (doses per day): |  |
| **neonate_abx3_stop_reason** |  | Reason for stopping antimicrobial: | 1, Course completed | 2, Clinical resolution | 3, Normalisation of inflammatory markers | 4, Clinical deterioration | 5, New clinical event / diagnosis | 6, Drug toxicity | 7, Drug allergy | 8, Drug error | 9, Drug out of stock | 10, Microbiology result obtained: gram-stain or identification | 11, Microbiology result obtained: susceptibility | 12, Microbiology result obtained: negative culture | 13, Imaging result | 14, Therapeutic drug monitoring | 15, Patient transferred | 16, Patient died | 98, Other (please specify): | 99, Unknown |
| **neonate_abx3_stop_other** |  |  |  |
| **episode_other_details** | Additional information |  |  |
| **culture_type** | Culture type & result | Culture Type: | 1, Blood | 2, CSF |
| **bloodcsf_date** |  | Date & Time collected: |  |
| **bloodcsf_culture_result** |  | Culture result: | 1, Negative | 2, Positive | 3, Contaminant (Corynebacterium (Diptheroids) spp., Fusobacterium spp., Micrococcus spp., Propionibacterium spp., Bacillus spp.) |
| **bloodcsf_pos_num** |  | Number of positive species: | 0, 0 | 1, 1 | 2, 2 | 3, 3 | 4, 4 | 5, 5 |
| **csf_pmns** |  | In the CSF, was there leukocytosis with a neutrophil predominance? |  |
| **csf_glucose** |  | In the CSF, was there a low glucose level? |  |
| **csf_protein2** |  | In the CSF, was there an elevated protein level? |  |
| **clabsi** |  | Did the patient have a central line (umbilical or non-umbilical) for more than 2 calendar days before the day of onset positive culture? |  |
| **bloodcsf_species1_type** | Species 1 | Pathogen Type: | 1, Gram negative | 2, Gram positive | 3, Fungal |
| **bloodcsf_species1** |  | Species 1: | 1, GRAM-NEGATIVE | 2, Acinetobacter baumannii | 3, Acinetobacter lwoffii | 4, Burkholderia cepacia | 5, Burkholderia mallei | 6, Burkholderia pseudomallei | 7, Campylobacter jejuni | 8, Campylobacter coli | 9, Citrobacter freundii | 10, Citrobacter koseri | 11, Enterobacter cloacae | 12, Enterobacter aerogenes | 13, Escherichia coli | 14, Haemophilus influenzae type b | 15, Haemophilus influenzae non-typeable strains | 16, Klebsiella oxytoca | 17, Klebsiella pneumoniae | 18, Proteus mirabilis | 19, Proteus vulgaris | 20, Pseudomonas aeruginosa | 21, Salmonella enterica var typhi | 22, Salmonella enterica var paratyphi | 23, Salmonella (non-typhoidal) | 24, Shigella dysenteriae | 25, Shigella flexneri | 26, Shigella sonnei | 27, Serratia marcescens | 28, GRAM-POSITIVE | 29, Coagulase Negative Staphylococcus Spp. (CoNS) | 30, Enterococcus faecalis | 31, Enterococcus faecium | 32, Listeria monocytogenes | 33, Streptococcus pyogenes (Group A Streptococcus, GAS) | 34, Streptococcus agalactiae (Group B Streptococcus, GBS) | 35, Streptococcus pneumoniae | 36, Staphylococcus aureus | 37, Staphylococcus saprophyticus | 38, FUNGAL | 39, Candida albicans | 40, Candida krusei | 41, Candida glabrata | 42, Candida guilliermondii | 43, Candida lusitaniae | 44, Candida parapsilosis | 45, Candida tropicalis | 98, Other - please specify |
| **fu_timepoint** | Follow-up time point is from time of RECRUITMENT (this is usually the babies chronological/non-corrected age) | Follow-up time-point: | 1, 28 days | 2, 3 months | 3, 6 months |
| **fu28_actual** |  | 28 day follow-up actual date: |  |
| **fu3_actual** |  | 3 month follow-up actual date: |  |
| **fu6_actual** |  | 6 month follow-up actual date: |  |
| **followup_possible** | Participant contactable | Was the participant's family able to be contacted? | 0, No | 1, Yes | 2, Still inpatient |
| **vital_status** | Condition | Vital status: | 0, Deceased | 1, Alive |
| **cx_inf** | Has the baby had any of the following since the last review (discharge or last follow-up): | Infection | 1, No | 2, Yes | 3, Unable to assess |
| **cx_inf_attention** |  | Infection requiring medical attention (visiting a doctor) | 1, No | 2, Yes | 3, Unable to assess |
| **cx_inf_hosp** |  | Infection requiring hospitalisation (overnight stay in hospital) | 1, No | 2, Yes | 3, Unable to assess |
| **cx_seizure** |  | Seizures | 1, No | 2, Yes | 3, Unable to assess |
| **cx_dd_fam** |  | Developmental concerns from family | 1, No | 2, Yes | 3, Unable to assess |
| **cx_dd_doctor** |  | Developmental concerns from doctor | 1, No | 2, Yes | 3, Unable to assess |
| **cx_ab** |  | Requirement for antimicrobials | 1, No | 2, Yes | 3, Unable to assess |
| **cx_dd_fam_spec** |  | Developmental domain of concern (from the family): | 1, Gross Motor (Gerak Kasar) | 2, Fine Motor (Gerak Halus) | 3, Language and Hearing (Bisabicara) | 4, Social (Sosialisasi) | 5, Vision |
| **cx_dd_doctor_spec** |  | Developmental domain of concern (from the doctor): | 1, Gross Motor (Gerak Kasar) | 2, Fine Motor (Gerak Halus) | 3, Language and Hearing (Bisabicara) | 4, Social (Sosialisasi) | 5, Vision |
| **cx_ab_num** |  | Number of antimicrobials | 1, 1 | 2, 2 | 3, 3 |
| **cx_ab1_name** |  | Name of antimicrobial 1 | 1, ANTIBIOTICS | 2, Amikacin | 3, Amoxicillin | 4, Amoxicillin with clavulanic acid | 5, Ampicillin | 6, Azithromycin | 7, Aztreonam | 8, Benzathine benzylpenicillin | 9, Benzylpenicillin | 10, Cefepime | 11, Cefixime | 12, Cefotaxime | 13, Ceftaroline | 14, Ceftazidime | 15, Ceftriaxone | 16, Cephalexin | 17, Cephazolin | 18, Chloramphenicol | 19, Ciprofloxacin | 20, Clarithromycin | 21, Clindamycin | 22, Cloxacillin | 23, Colistin | 24, Daptomycin | 25, Doxycycline | 26, Erythromycin | 27, Ethambutol | 28, Faropenem | 29, Fosfomycin | 30, Gentamicin | 31, Imipenem and cilastatin | 32, Isoniazid | 33, Levofloxacin | 34, Linezolid | 35, Meropenem | 36, Metronidazole | 37, Nitrofurantoin | 38, Phenoxymethylpenicillin | 39, Piperacillin-tazobactam | 40, Polymixin B | 41, Procaine benzylpenicillin | 42, Pyrazinamide | 43, Rifampicin | 44, Spectinomycin | 45, Sulfamethoxazole-trimethoprim | 46, Teicoplanin | 47, Tigecycline | 48, Vancomycin | 49, ANTIFUNGALS | 50, Amphotericin B | 51, Anidulafungin | 52, Caspofungin | 53, Flucytosine | 54, Fluconazole | 55, Itraconazole | 56, Micafungin | 57, Posaconazole | 58, Voriconazole | 59, ANTIVIRALS | 60, Abacavir (ABC) | 61, Aciclovir | 62, Dolutegravir (DTG) | 63, Emtricitabine (FTC) | 64, Efavirenz (EFV) | 65, Foscarnet | 66, Ganciclovir | 67, Lamivudine (3TC) | 68, Lopinavir/ritonavir (LPV/r) | 69, Nevirapine (NVP) | 70, Raltegravir (RAL) | 71, Tenofovir | 72, Valganciclovir | 73, Zidovudine (AZT) | 98, Other - please specify | 99, Unknown |
| **cx_ab1_name_other** |  | Other antibiotic 1: |  |
| **cx_ab_ind1** |  | Indication for antibiotic 1 | 1, Upper respiratory tract infection | 2, Lower respiratory tract infection | 3, Gastrointestinal infection | 4, Urinary Tract infection | 5, CNS infection | 6, Skin or soft tissue infection | 7, Bone or joint infection | 98, Other | 99, Unknown |
| **cx_ab1_ind_other** |  | Other indication for antibiotic 1: |  |
| **cx_ab1_start** |  | Antimicrobial 1 start date |  |
| **cx_abx1_stop** |  | Antimicrobial 1 stop date |  |
| **fu_feeding** | Feeding | Feeding since last review (discharge or last follow up): | 0, Formula | 1, Breastfeeding | 2, Mixed |
| **exit_reason** |  | Exit Reason: | 1, Study Completion (post 3 month follow-up) | 2, Lost to follow-up | 3, Participant decision to un-enroll | 4, Death | 5, Other |
| **exit_time** |  | Exit Date/Time: |  |
